# Supplementary material for: The Screening of Broadly Neutralizing Antibodies Targeting the SARS-CoV-2 Spike Protein by mRNA Immunization in Mice
Source: MDPI journal article supplement (doi:10.3390/pharmaceutics15051412), 2023-05-05
Supplement: s1 [file s1]

1. Supplementary figures:

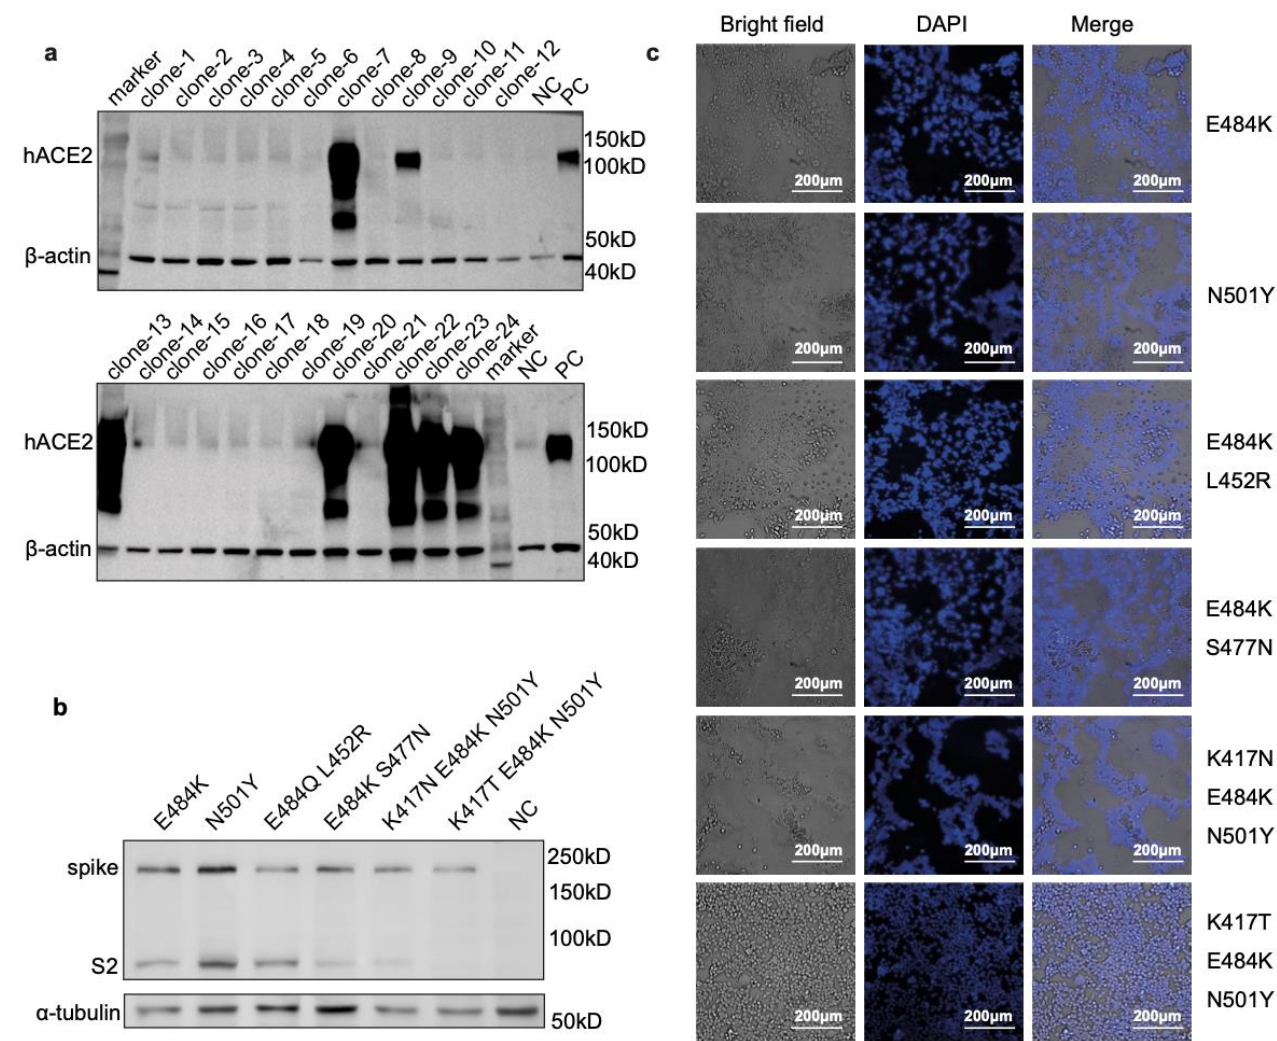

**Figure S1.** Spike-mediated membrane fusion experiment. (a) Quantification of hACE2 expression in monoclonal 293T cells by WB after stable cell line construction. NC, wild-type HEK293T cells. PC, 293T ACE2 stable cell line constructed by infection of plenti-virus carrying plenti-hACE2-puromycin plasmid and selected by puromycin. (b) Verification of expression of variant spikes introduced specific mutations of in RBD in 293T cells by WB. NC, 293T cells without transfection.

(c) Membrane fusion phenomenon under bright field and fluorescence. Expression vectors of variant spikes were transfected into 293T ACE2 cells. 24 hours later, DAPI was used to stain DNA to observe the syncytia formation. Scale bar, 200  $\mu\text{m}$ .

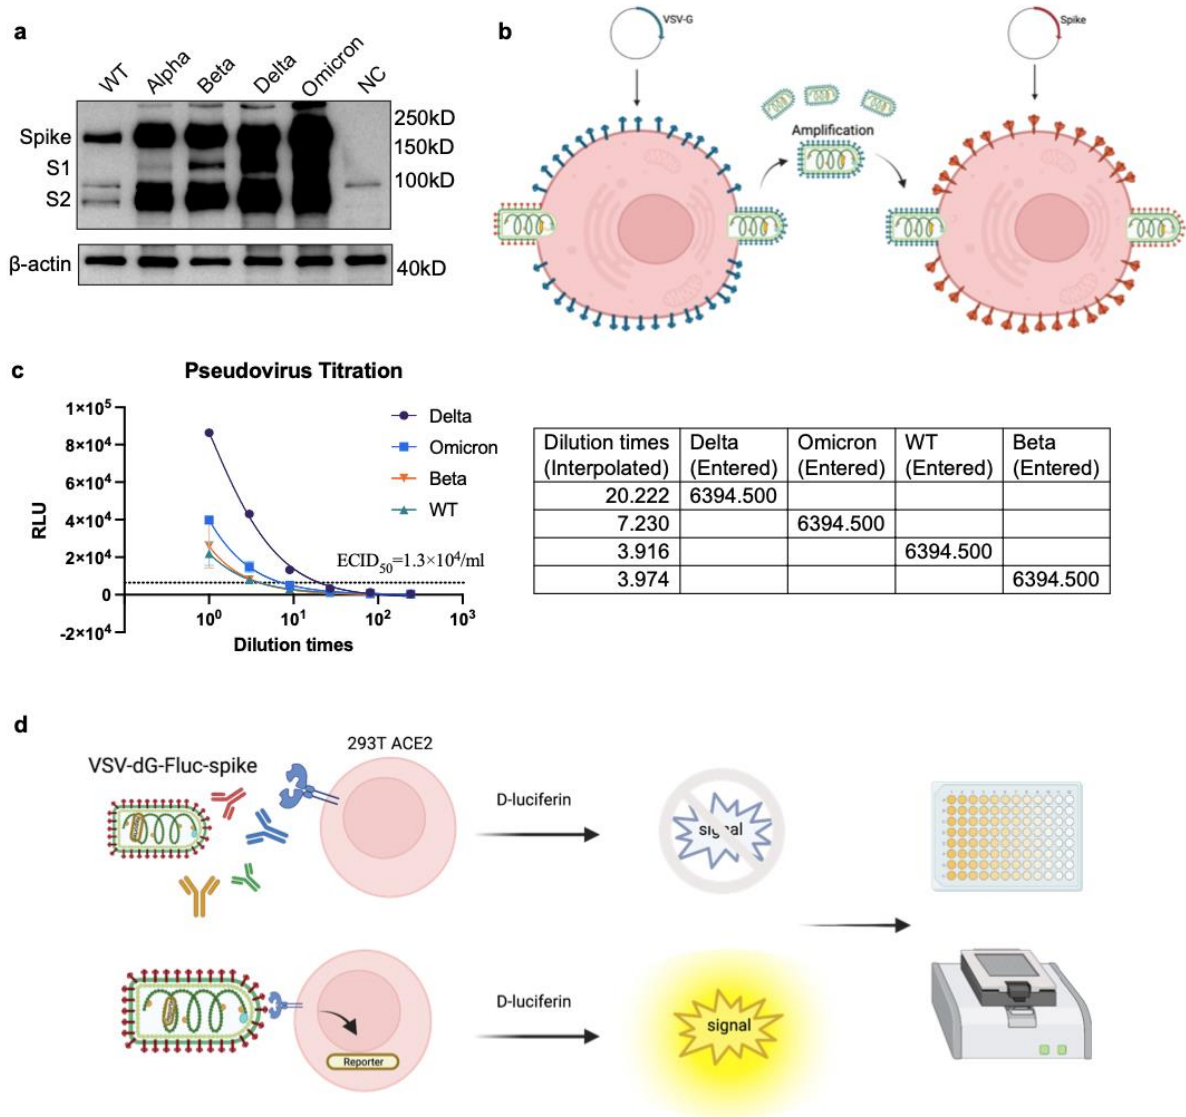

**Figure S2.** Pseudoviruses preparation and establishment of VSV-based neutralizing assay. (a) Verification of spike variants expression by WB for pseudoviruses preparation. (b) Diagram of pseudovirus preparation. VSV-dG-Fluc was firstly produced from Omicron BA.1 pseudovirus. The variant pseudoviruses were produced by VSV-dG-Fluc infection following the transfection of expressing vectors of variant spike. The schematic was created on Biorender.com. (c) Pseudovirus titration and dilution times standardized to  $1.3 \times 10^4/\text{ml}$   $\text{ECID}_{50}$ . Titration curves of different variants were on the left while titration times standardized to  $1.3 \times 10^4/\text{ml}$   $\text{ECID}_{50}$  were shown on the right. (d) Workflow of neutralizing assay. The diagram was created on Biorender.com.

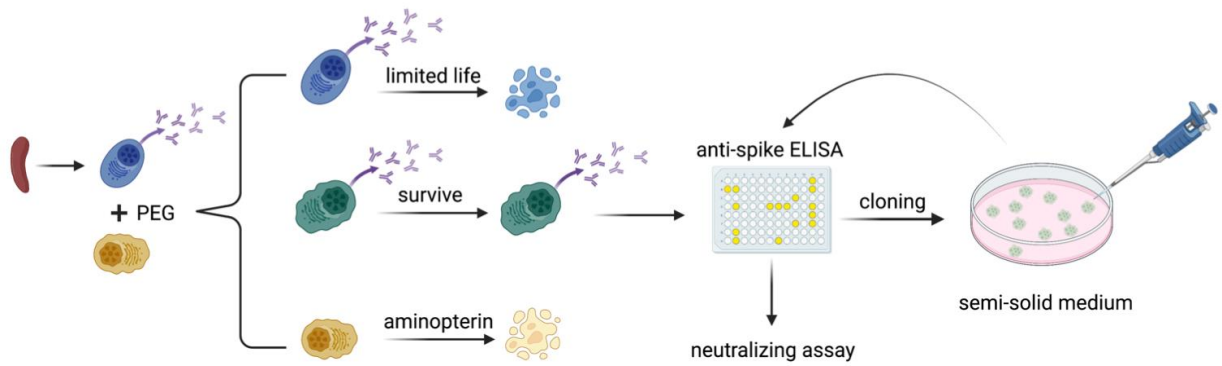

**Figure S3.** Overview of hybridoma technology workflow. The splenocytes were firstly collected and fused with prepared SP2/0 cells mediated by PEG. After 7-10 days of HAT screening, the positive wells were spotted in ELISA. Semi-solid HT medium was used for cloning of polyclonal cells in positive wells. The picture was created on Biorender.com.

|                                  |                                                      |                                                                |
|----------------------------------|------------------------------------------------------|----------------------------------------------------------------|
| M29672_IGHV_6D6                  | <-----FR1-IMGT----->                                 | caggtgcaactgcagcagctctgggcct...cagctgggttaggcctggggcttcagtgaag |
| AF304545 Musmus IGHV1S126*01 [F] | -----C-----g-----g-----g-----a-----                  |                                                                |
| AF304546 Musmus IGHV1S127*01 [F] | ---c-----c-----g---...g-----g-----a-----             |                                                                |
| AC160473 Musmus IGHV1-74*01 F    | ---c-----c-----g---...g-----g-----a-----             |                                                                |
| J00537 Musmus IGHV1-74*04 F      | --t-c-----c-----g---...g-----g-----a-----            |                                                                |
| AC087166 Musmus IGHV1-59*01 F    | ---c-----c-----g---...g-----g-----a-----             |                                                                |
| M29672_IGHV_6D6                  | ----->-----CDR1-IMGT-----<-----                      | atatcctgcaaggcttctggttactcattc.....accagctactggatgcac          |
| AF304545 Musmus IGHV1S126*01 [F] | -----c-----a-----c-----.....a-----a-----             |                                                                |
| AF304546 Musmus IGHV1S127*01 [F] | --g-----c-----a-----c-----.....a-----a-----          |                                                                |
| AC160473 Musmus IGHV1-74*01 F    | g-g-----c-----a-----c-----.....a-----a-----          |                                                                |
| J00537 Musmus IGHV1-74*04 F      | g-g-----c-----a-----c-----.....a-----a-----          |                                                                |
| AC087166 Musmus IGHV1-59*01 F    | t-g-----c-----a-----c-----.....a-----a-----          |                                                                |
| M29672_IGHV_6D6                  | -----FR2-IMGT----->-----CDR                          | tggggtgaagcagaggcctggacaaggctctgagtggtggcattgattgatccttcc...   |
| AF304545 Musmus IGHV1S126*01 [F] | -----c-----c-----c-----a-----c-----t-----t-----      |                                                                |
| AF304546 Musmus IGHV1S127*01 [F] | -----c-----c-----c-----a-----c-----a-----a-----      |                                                                |
| AC160473 Musmus IGHV1-74*01 F    | -----c-----c-----c-----a-----c-----a-----t-----      |                                                                |
| J00537 Musmus IGHV1-74*04 F      | -----c-----c-----c-----a-----c-----a-----t-----      |                                                                |
| AC087166 Musmus IGHV1-59*01 F    | -----a-----c-----c-----c-----a-----a-----t-----      |                                                                |
| M29672_IGHV_6D6                  | 2-IMGT-----<-----                                    | ...gatagtgaaactagggttaaatcagaagttcaag...gacaaggccacattgactgta  |
| AF304545 Musmus IGHV1S126*01 [F] | ...-----t-----t-----acaac-----a-----t-----t-----     |                                                                |
| AF304546 Musmus IGHV1S127*01 [F] | ...-----t-----t-----c-----ac-----a-----t-----t-----  |                                                                |
| AC160473 Musmus IGHV1-74*01 F    | ...-----t-----t-----ac-----ac-----a-----t-----t----- |                                                                |
| J00537 Musmus IGHV1-74*04 F      | ...-----t-----t-----ac-----ac-----a-----t-----t----- |                                                                |
| AC087166 Musmus IGHV1-59*01 F    | ...-----t-----t-----ac-----ac-----a-----t-----t----- |                                                                |
| M29672_IGHV_6D6                  | -----FR3-IMGT-----                                   | gacaaatcctccagcacagcctacatgcaactcagcagcccacatctgaggactctgcg    |
| AF304545 Musmus IGHV1S126*01 [F] | -----c-----g-----t-----t-----a-----t-----            |                                                                |
| AF304546 Musmus IGHV1S127*01 [F] | ---c-----g-----t-----t-----a-----t-----              |                                                                |
| AC160473 Musmus IGHV1-74*01 F    | -----c-----g-----t-----t-----a-----t-----            |                                                                |
| J00537 Musmus IGHV1-74*04 F      | -----c-----g-----t-----t-----a-----t-----            |                                                                |
| AC087166 Musmus IGHV1-59*01 F    | ---c-----g-----t-----t-----a-----t-----              |                                                                |
| M29672_IGHV_6D6                  | ----->-----CDR3-IMGT-----                            | gtctattactgtgcaagaggggggaccctaacttctgactactggggccaaggcaccacg   |
| AF304545 Musmus IGHV1S126*01 [F] | -----a-----                                          |                                                                |
| AF304546 Musmus IGHV1S127*01 [F] | -----t-----                                          |                                                                |
| AC160473 Musmus IGHV1-74*01 F    | -----t-----                                          |                                                                |
| J00537 Musmus IGHV1-74*04 F      | -----t-----                                          |                                                                |
| AC087166 Musmus IGHV1-59*01 F    | -----t-----                                          |                                                                |

**Figure S4.** Sequence alignment of variable regions of 6D6 heavy chain. The antibody alignment was completed on IMGT/V-QUEST. The variable region of 6D6 heavy chain was named as M29672\_IGHV\_6D6.

|                                 |  |  |                                                              |
|---------------------------------|--|--|--------------------------------------------------------------|
| M29672_IGKV_6D6                 |  |  | <----- FR1-IMGT ----->                                       |
| AJ231217 Musmus IGKV4-74*01 F   |  |  | caaattgttctcaccagctctccagcaatcatgtctgcattcttaggggaacgggtcacc |
| AJ231216 Musmus IGKV4-73*01 ORF |  |  | -----ct-----                                                 |
| AJ231212 Musmus IGKV4-78*01 F   |  |  | -----ct---gaa-----                                           |
| AJ231209 Musmus IGKV4-61*01 F   |  |  | -----c---gaa-----                                            |
| AJ231214 Musmus IGKV4-79*01 F   |  |  | -----ct---gaa-----                                           |
| M29672_IGKV_6D6                 |  |  | ----->----- CDR1-IMGT -----<-----                            |
| AJ231217 Musmus IGKV4-74*01 F   |  |  | atgacctgcactgccagctcaagtgttaagt.....tccagtacttgac            |
| AJ231216 Musmus IGKV4-73*01 ORF |  |  | -----g-----c-----t-----                                      |
| AJ231212 Musmus IGKV4-78*01 F   |  |  | -----g---a-----c-----t-----                                  |
| AJ231209 Musmus IGKV4-61*01 F   |  |  | --at---g-----a-----t-----                                    |
| AJ231214 Musmus IGKV4-79*01 F   |  |  | t-----g-----c-----t-----                                     |
| M29672_IGKV_6D6                 |  |  | ----- FR2-IMGT ----->----- CDR                               |
| AJ231217 Musmus IGKV4-74*01 F   |  |  | tggtaccagcagaagccaggatcctcccccactctggatttatagcaca.....       |
| AJ231216 Musmus IGKV4-73*01 ORF |  |  | -----t-----a-----t-----                                      |
| AJ231212 Musmus IGKV4-78*01 F   |  |  | -----c-----c-----                                            |
| AJ231209 Musmus IGKV4-61*01 F   |  |  | -----c-----c-----                                            |
| AJ231214 Musmus IGKV4-79*01 F   |  |  | -----c-----c-----                                            |
| M29672_IGKV_6D6                 |  |  | 2-IMGT -----<-----                                           |
| AJ231217 Musmus IGKV4-74*01 F   |  |  | .....tccaacctggcttctggagtccca...gctcgcttcagtggcagtgagg       |
| AJ231216 Musmus IGKV4-73*01 ORF |  |  | .....t-----t-----                                            |
| AJ231212 Musmus IGKV4-78*01 F   |  |  | .....t-----t-----                                            |
| AJ231209 Musmus IGKV4-61*01 F   |  |  | .....t-----t-----                                            |
| AJ231214 Musmus IGKV4-79*01 F   |  |  | .....t-----t-----                                            |
| M29672_IGKV_6D6                 |  |  | ----- FR3-IMGT ----->-----                                   |
| AJ231217 Musmus IGKV4-74*01 F   |  |  | .....tctgggaccttactctctcacaatcagcagcatggaggctgaagatgctgcc    |
| AJ231216 Musmus IGKV4-73*01 ORF |  |  | .....a-----                                                  |
| AJ231212 Musmus IGKV4-78*01 F   |  |  | .....t-----                                                  |
| AJ231209 Musmus IGKV4-61*01 F   |  |  | .....t-----                                                  |
| AJ231214 Musmus IGKV4-79*01 F   |  |  | .....t-----                                                  |
| M29672_IGKV_6D6                 |  |  | ----->----- CDR3-IMGT -----<-----                            |
| AJ231217 Musmus IGKV4-74*01 F   |  |  | acttattactgccaccagtatcatcgttccccaccacgttcggaggggggaccaagctg  |
| AJ231216 Musmus IGKV4-73*01 ORF |  |  | -----g---ggag-a--aa-----                                     |
| AJ231212 Musmus IGKV4-78*01 F   |  |  | ---t-----g---cag-g---a---t---                                |
| AJ231209 Musmus IGKV4-61*01 F   |  |  | -----g-----a---a-----                                        |
| AJ231214 Musmus IGKV4-79*01 F   |  |  | t-----t-----t---ggag-a---a-----c                             |

Figure S5. Sequence alignment of variable regions of 6D6 kappa chain. The antibody alignment was completed on IMGT/V-QUEST. The variable region of 6D6 kappa chain was named as M29672\_IGKV\_6D6.

## 2. Supplementary tables:

Table S1. Primers for mutation induction on spike protein.

| Primers | Sequence             |
|---------|----------------------|
| T478K-F | CCGGCAGCAAACCTTGCAAT |
| T478K-R | ATTGCAAGGTTTGCTGCCGG |

|                    |                                      |
|--------------------|--------------------------------------|
| P681R-F            | GCAGAAGAGCCCGGAGC                    |
| P681R-R            | CGAGAGTTTGTCTGGGTCTGG                |
| D950N-F            | CAAGCTCCAGAATGTGGTGAATC              |
| D950N-R            | GATTCACCACATTCTGGAGCTTG              |
| E156G Del157/158-F | GGAGTCCGGGGTGTATTCTAGCGCCAACAACACTGC |
| E156G Del157/158-R | TAGAATACACCCCGGACTCCATCCAGCTCTTATTG  |
| T19R-F             | CGTCAATCTGAGAACTCGGACTC              |
| T19R-R             | GAGTCCGAGTTCTCAGATTGACG              |
| A701V-F            | CTGGGCGTCGAGAACAG                    |
| A701V-R            | CTGTTCTCGACGCCAG                     |
| D80A-F             | AGCGGTTGCGCAATCCCG                   |
| D80A-R             | CGGGATTGGCGAACCGCT                   |
| D215G-F            | GTGCGCGGCCTGCCT                      |
| D215G-R            | AGGCAGGCCGCGCAC                      |

**Table S2. Primers for antibody variable region sequencing and amplification.**

| Primers               | Sequence                          |
|-----------------------|-----------------------------------|
| Template-switch oligo | AAGCAGTGGTATCAACGCAGAGTACATGrGrGr |
| mIGK RT               | TTGTCGTTCACTGCCATCAATC            |
| mIGL RT               | GGGGTACCATCTACCTTCCAG             |
| mIGHG RT              | AGCTGGGAAGGTGTGCACAC              |

---

|                     |                                            |
|---------------------|--------------------------------------------|
| ISPCR               | AAGCAGTGGTATCAACGCAGAG                     |
| mIGK PCR            | ACATTGATGTCTTTGGGGTAGAAG                   |
| mIGL PCR            | ATCGTACACACCAGTGTGGC                       |
| mIGHG PCR           | GGGATCCAGAGTTCCAGGTC                       |
| mouse IgG nest-2 R  | CCTTGGTGGAGGCGTCGAACGGTGACCGTGG            |
|                     | CCTTGGTGGAGGCGTCGAACTGTGAGAGTGG            |
|                     | CCTTGGTGGAGGCGTCGAACAGTGACCAGAG            |
|                     | CCTTGGTGGAGGCGTCGAACGGTGACTGAGG            |
| mouse IgK nest-2 R  | GCCGCCACAGTTCGTCGATTTTCAGCTCCAGCTTGGTCCC   |
|                     | GCCGCCACAGTTCGTCGATTTTATTTCCAGTCTGGTCCC    |
|                     | GCCGCCACAGTTCGTCGATTTKATTTCCARCTTKGTSCC    |
| cloning-ISPCR-F     | ACAGGAGCCCACTCCCGTACAAGCAGTGGTATCAACGCAGAG |
| K/L-cloning-ISPCR-F | CCAGGTTCCAGATGCACCGGAAGCAGTGGTATCAACGCAGAG |

---

### 3. Antibody sequence:

Variable region of heavy chain of 6D6 neutralizing antibody:

CAGGTGCAACTGCAGCAGTCTGGGCCTCAGCTGGTTAGGCCTGGGGCTTCAGTGAAGAT  
 ATCCTGCAAGGCTTCTGGTTACTCATTACACAGCTACTGGATGCACTGGGTGAAGCAGA  
 GGCCTGGACAAGGTCTTGAGTGGATTGGCATGATTGATCCTTCCGATAGTGAACTAGG  
 TTAAATCAGAAGTTCAAGGACAAGGCCACATTGACTGTAGACAAATCCTCCAGCACAGC  
 CTACATGCAACTCAGCAGCCCGACATCTGAGGACTCTGCGGTCTATTACTGTGCAAGAG  
 GGGGGGACCCTAACTTTGACTACTGGGGCCAAGGCACACGGTCACCGTCTCG

Variable region of light chain of 6D6 neutralizing antibody:

CAAATTGTTCTCACCCAGTCTCCAGCAATCATGTCTGCATCTCTAGGGGAACGGGTCACC  
 ATGACCTGCACTGCCAGCTCAAGTGTAAGTTCCAGTTACTTGCACTGGTACCAGCAGAA

GCCAGGATCCTCCCCAAACTCTGGATTTATAGCACATCCAACCTGGCTTCTGGAGTCCC  
AGCTCGCTTCAGTGGCAGTGGGTCTGGGACCTCTTACTCTCTCACAATCAGCAGCATGGA  
GGCTGAAGATGCTGCCACTTATTACTGCCACCAGTATCAT
